# Supplementary material for: 2D V2C MXene/2D g-C3N4 nanosheet heterojunctions constructed via a one-pot method for remedying water pollution through high-efficient adsorption together with in situ photocatalytic degradation
Source: Royal Society of Chemistry journal article supplement (doi:10.1039/d4ra07222g), 2025-01-01
Supplement: d4ra07222g1.pdf [file d4ra07222g1.pdf]

ARTICLE

## 2D V<sub>2</sub>C MXene/ 2D g-C<sub>3</sub>N<sub>4</sub> nanosheet heterojunctions constructed via - one-pot method for remedying water pollution through high-efficient adsorption cooperated with in-situ photocatalytic degradation

Received 00th January 20xx,  
Accepted 00th January 20xx

DOI: 10.1039/x0xx00000x

Shishan Xue,<sup>\*a</sup> Dengliang He,<sup>\*a</sup> Herong Zhang,<sup>a</sup> Yuning Zhang,<sup>a</sup> Yu Wang,<sup>a</sup> Yurong Zeng,<sup>a</sup> Shuxin Liu,<sup>a</sup> Ning Chen<sup>a</sup>

### Experimental Section

#### Materials

Urea (AR≥99%) and hydrofluoric acid (HF, 49%) were purchased from Shanghai Macklin Biochemical Co., Ltd. to synthesis the graphitic carbon nitride (g-C<sub>3</sub>N<sub>4</sub>). V<sub>2</sub>AlC Max (≥99%) was purchased from Jinzhou Haixin Metal Materials Co., Ltd. as the precursor to prepare V<sub>2</sub>C MXene. Rhodamine B (RhB), crystal violet (CV), methylene blue (MB) were obtained from Fuchen (Tianjin) Chemical Reagent Co., LTD. Hydrochloric acid (HCl, 37%) and sodium hydroxide (NaOH, AR) were acquired from Merck & Co. Inc. All the chemicals were used directly without refinement. Deionized water was used throughout the experiment.

#### Synthesis of bulk g-C<sub>3</sub>N<sub>4</sub>

The thermal polycondensation approach was carried out to synthesis g-C<sub>3</sub>N<sub>4</sub> using urea as precursor.<sup>1</sup> 2Urea (10.0 g) was placed in a corundum crucible with lid and heated in muffle furnace at 550 °C with the heating rate of 10 °C/min for 2 h in air atmosphere. The fine faint yellow powder was the as-prepared bulk g-C<sub>3</sub>N<sub>4</sub> which was preserved in sealed vessels for following fabrication of heterojunction.

#### Synthesis of V<sub>2</sub>C MXene

The V<sub>2</sub>C MXene nanosheets was obtained by etching V<sub>2</sub>AlC Max with HF solution in Teflon tank to remove Al layer.<sup>3</sup> Firstly, V<sub>2</sub>AlC Max (1.0 g) was added to HF (20 mL) in Teflon tank magnetically stirred for different etching time (12 h, 24 h, 48 h) at room temperature. Then, all the V<sub>2</sub>C MXene suspensions were centrifuged to gather the powder and washed by deionized water until the pH value of the supernatant reached ~6 (Scheme 1a). The best etching time of V<sub>2</sub>C MXene was 48 h.

Finally, the product was freezing-dried for 3 days to obtain V<sub>2</sub>C MXene nanosheets.

#### Synthesis of 2D/2D V<sub>2</sub>C MXene/g-C<sub>3</sub>N<sub>4</sub> nanosheet heterojunctions

The novel and simple strategy of one-pot simultaneously etching and self-assembling method was firstly employed to fabricate 2D/2D V<sub>2</sub>C MXene/g-C<sub>3</sub>N<sub>4</sub> nanosheet composite. The best synthesis route of V<sub>2</sub>C MXene was ascertained in the previous etching step which was employed in this procedure to construct the 2D/2D V<sub>2</sub>C MXene/g-C<sub>3</sub>N<sub>4</sub> nanosheet heterojunction (2D/2D V<sub>2</sub>C/g-C<sub>3</sub>N<sub>4</sub> heterojunction). Briefly, V<sub>2</sub>AlC Max and the obtained bulk g-C<sub>3</sub>N<sub>4</sub> was added in the HF solution (20 mL) with different mass ratio (V<sub>2</sub>AlC: g-C<sub>3</sub>N<sub>4</sub>=2:1, 1:1, 1:2, 1:5, 1:7) in Teflon tank magnetically stirred for 48 h at room temperature. During the procedure, the Al layer of V<sub>2</sub>AlC Max was removed to get V<sub>2</sub>C MXene and the bulk g-C<sub>3</sub>N<sub>4</sub> was etching exfoliated to g-C<sub>3</sub>N<sub>4</sub> nanosheets. Meanwhile, V<sub>2</sub>C MXene and g-C<sub>3</sub>N<sub>4</sub> nanosheets self-assembled to receive the 2D/2D V<sub>2</sub>C/g-C<sub>3</sub>N<sub>4</sub> heterojunction. Subsequently, the suspensions were centrifuged and washed by deionized water until the pH value of the supernatant reached ~6 to gather the V<sub>2</sub>C/g-C<sub>3</sub>N<sub>4</sub> powder. Afterward, the final products were freezing-dried for 3 days to obtain 2D/2D V<sub>2</sub>C/g-C<sub>3</sub>N<sub>4</sub> heterojunction (Scheme 1b). The 2D/2D V<sub>2</sub>C/g-C<sub>3</sub>N<sub>4</sub> heterojunction were noted as V<sub>x</sub>G<sub>y</sub>, where V defined as V<sub>2</sub>C MXene, G reflected as g-C<sub>3</sub>N<sub>4</sub> nanosheets, x and y were the mass ratio of V<sub>2</sub>AlC: g-C<sub>3</sub>N<sub>4</sub> (2:1, 1:1, 1:2, 1:5, 1:7).

#### Characterization

The crystalline phase and structure of the composites were determined by X-ray diffraction (XRD, Rigaku Ultima IV) using Cu K<sub>α</sub> radiation, λ=1.5406 Å with the scanning rate of 10°/min from 5° to 90°. Fourier Transform Infrared (FT-IR) spectroscopy (Nicolet 6700 FTIR) recorded the functional moieties of the composite hydrogel in the wavenumber range from 400-4000 cm<sup>-1</sup>. The Raman analysis was performed by Raman spectroscopy (Renishaw-inVia) with laser emission wavelength of 532 nm. The X-ray photoelectron spectra (XPS) were

<sup>a</sup> Chemistry and Chemical Engineering School, Mianyang Teachers' College, Mianxing Road No. 166, Mianyang City, Sichuan Province, China. 621000. E-mail: [xueshishan@163.com](mailto:xueshishan@163.com); 449011902@163.com

Supplementary Information available: [details of any supplementary information available should be included here]. See DOI: 10.1039/x0xx00000x

collected on Thermo Scientific ESCALAB Xi+ X-ray Photoelectron Spectrometer. Zeiss EVO MA15 scanning electronic microscope (SEM) was employed to observe the microstructure of the materials, while elemental composition was carried out using Energy Dispersive X-ray spectroscopy (EDX). Zeta Potential was performed by the dynamic light scattering measurement (Nano ZS, Malvern Instruments Ltd) at room temperature in the neutral environment. The specific surface area of the materials was calculated by N<sub>2</sub> adsorption-desorption isotherm data measured by Brunauer-Emmett-Teller (BET) analysis conducted with a surface area analyzer (Quantachrome Instruments v10.0). Photoluminescence (PL, Dual-FL) was carried out to investigate the effects of rate of recombination of the 2D/2D V<sub>2</sub>C/g-C<sub>3</sub>N<sub>4</sub> heterojunction. The light adsorption and gap were estimated by diffuse reflectance spectra (DRS, UV-3600Plus) in the ultraviolet-visible (UV-vis) range. Electrochemical experiments were made with 0.1 M Na<sub>2</sub>SO<sub>4</sub> or 0.5M KCl in an electrode system consisting of Pt wire, Ag/AgCl electrode, and sample electrode (reference electrode) using an electrochemical workstation (CHI 660D) under dark environment or visible light environment.

#### Adsorption Test

The different amounts of dye contaminants (RhB, CV, MB) were dissolved in the deionized water with different pH value (4, 7, or 10) regulated by HCl or NaOH to obtain the dye solution with the concentration of 15, 20, or 25 mg/L. The V<sub>x</sub>G<sub>y</sub> (0.1 g) was added to the different dye solutions (100 mL) under dark environment. The concentrations of the dye solutions at different time were calculated by a predetermined calibration curve versus dye concentrations of a standard solution which were surveyed by UV-Visible spectrophotometry (PerkinElmer, model Lambda 650, Shelton, Connecticut, U.S.A) at λ<sub>max</sub> (RhB for 554 nm, CV for 584 nm and MB for 660 nm). The adsorption rate was calculated by the following formula:

$$DR = \frac{C_0 - C_t}{C_0} \times 100\% \quad (\text{E-1})$$

where C<sub>0</sub> is the original concentration of the dye solutions, C<sub>t</sub> is the concentration of the solution after the adsorption by V<sub>x</sub>G<sub>y</sub> at different times.

#### Kinetics of dyes adsorption on 2D/2D V<sub>2</sub>C/g-C<sub>3</sub>N<sub>4</sub> heterojunction

The adsorption experiments in different dye solutions were executed to evaluate the adsorption kinetics. The adsorption capacity of obtained V<sub>x</sub>G<sub>y</sub> for RhB, CV or MB at equilibrium (Q<sub>e</sub>, mg/g) and different time intervals (Q<sub>t</sub>, mg/g) were calculated via the following equations:

$$Q_t = \frac{(C_0 - C_t) \times V}{m} \quad (\text{E-2})$$

$$Q_t = \frac{(C_0 - C_t) \times V}{m} \quad (\text{E-3})$$

Where, C<sub>0</sub> (mg/L) is the initial concentration of RhB, CV or MB solutions, C<sub>e</sub> (mg/L) and C<sub>t</sub> (mg/L) are the concentration of RhB, CV or MB solutions at equilibrium and a given time t, respectively. V (L) is the volume of RhB, CV or MB solutions and m (g) represents the weight of obtained V<sub>x</sub>G<sub>y</sub>.

The adsorption behavior of as-prepared V<sub>x</sub>G<sub>y</sub> for RhB, CV or MB was investigated through pseudo-first-order kinetic model, pseudo-second-order kinetic model and intraparticle diffusion model, of which formulas were shown as follow:

$$\ln(Q_e - Q_t) = \ln Q_e - K_1 t \quad (\text{E-6})$$

$$\frac{Q_t}{Q_e} = \frac{K_2 Q_e^2}{K_2 Q_e^2 + Q_e} \quad (\text{E-7})$$

$$Q_t = K_p t^{0.5} + C \quad (\text{E-8})$$

Where K<sub>1</sub> (min<sup>-1</sup>), K<sub>2</sub> (min<sup>-1</sup>) and K<sub>p</sub> (g/mg/min) was the adsorption rate constant of pseudo-first-order kinetic model, pseudo-second-order kinetic model and intraparticle diffusion model, respectively. C reflects a constant associated with the boundary layer. The implications of Q<sub>e</sub> and Q<sub>t</sub> were displayed in previous paragraph.

#### Photocatalysis Degradation Test

The photodegradation of dye pollutants (RhB, CV and MB) with the different original concentrations of 15, 20 and 25 mg/L at different pH values of 4, 7 and 10) was researched using by V<sub>x</sub>G<sub>y</sub> composites which were beforehand put in the dye solution for 50 min in dark environment under magnetic stirring at room temperature to exclude the influence of adsorption. The light with full spectrum to visible light was supplied by metal halide lamp (50 W). The dye solutions equipping with V<sub>x</sub>G<sub>y</sub> composites in the beaker were placed between two lamps from which were at the distance of 20 cm (the intensity of light irradiation was controlled at 100 W/m<sup>2</sup>). The solutions underwent the photodegradation procedure were measured by UV-vis spectrophotometry (PerkinElmer, model Lambda 650, Shelton, Connecticut, U.S.A) at λ<sub>max</sub> (RhB for 554 nm, CV for 584 nm and MB for 660 nm). The photodegradation ratio was calculated by the equation: DR =  $\frac{C_0 - C_t}{C_0} \times 100\%$  (E-9)

where C<sub>0</sub> is the concentration of the solution before illumination, C<sub>t</sub> is the concentration of the solution after illumination.

## Results

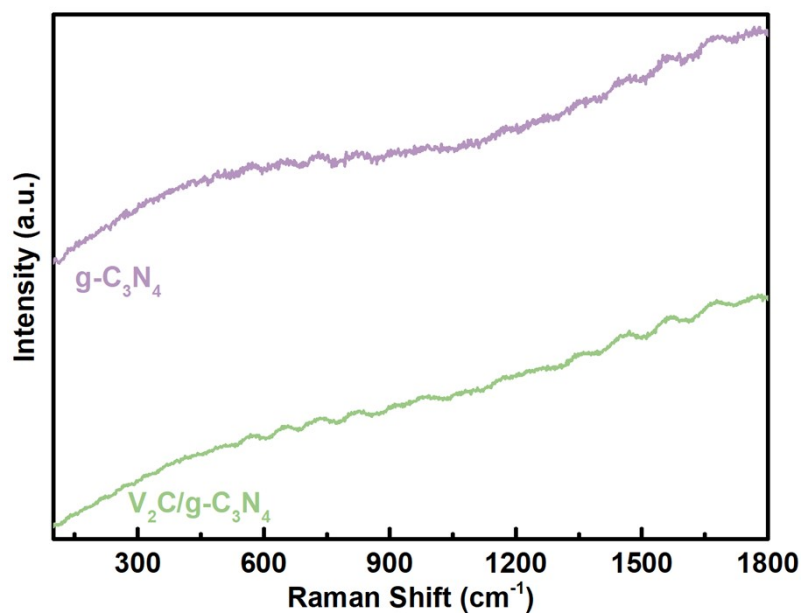

Fig. S1 Raman Spectra of bulk  $g\text{-C}_3\text{N}_4$  and  $\text{V}_2\text{C}/g\text{-C}_3\text{N}_4$  heterojunction.

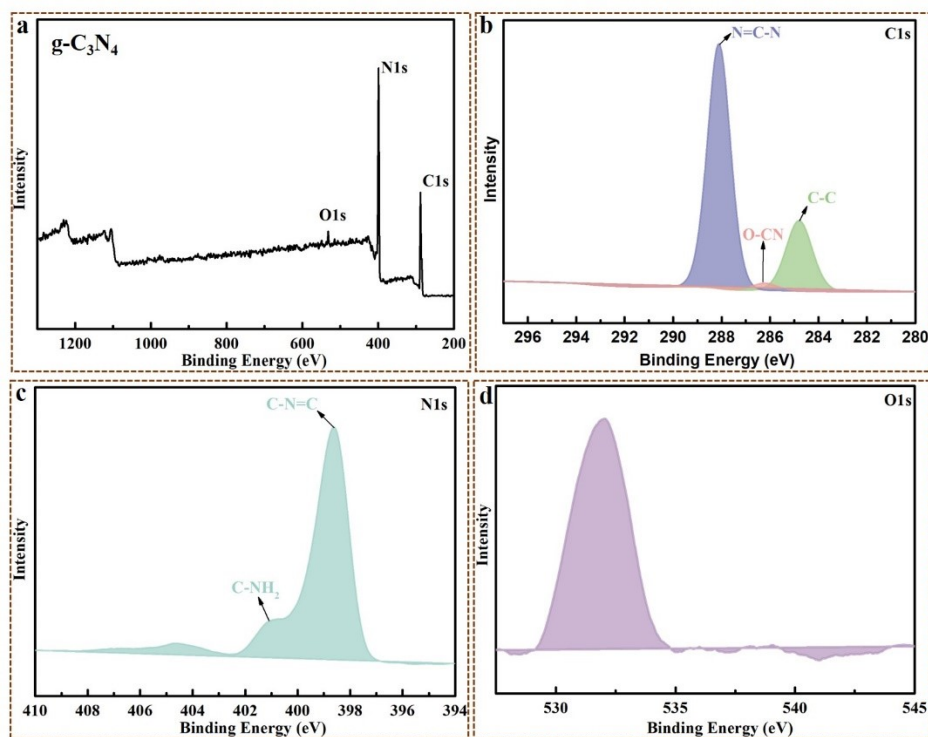

Fig. S2 The XPS spectra of (a)  $g\text{-C}_3\text{N}_4$ ; (b) C 1s; (c) N 1s; (d) O 1s

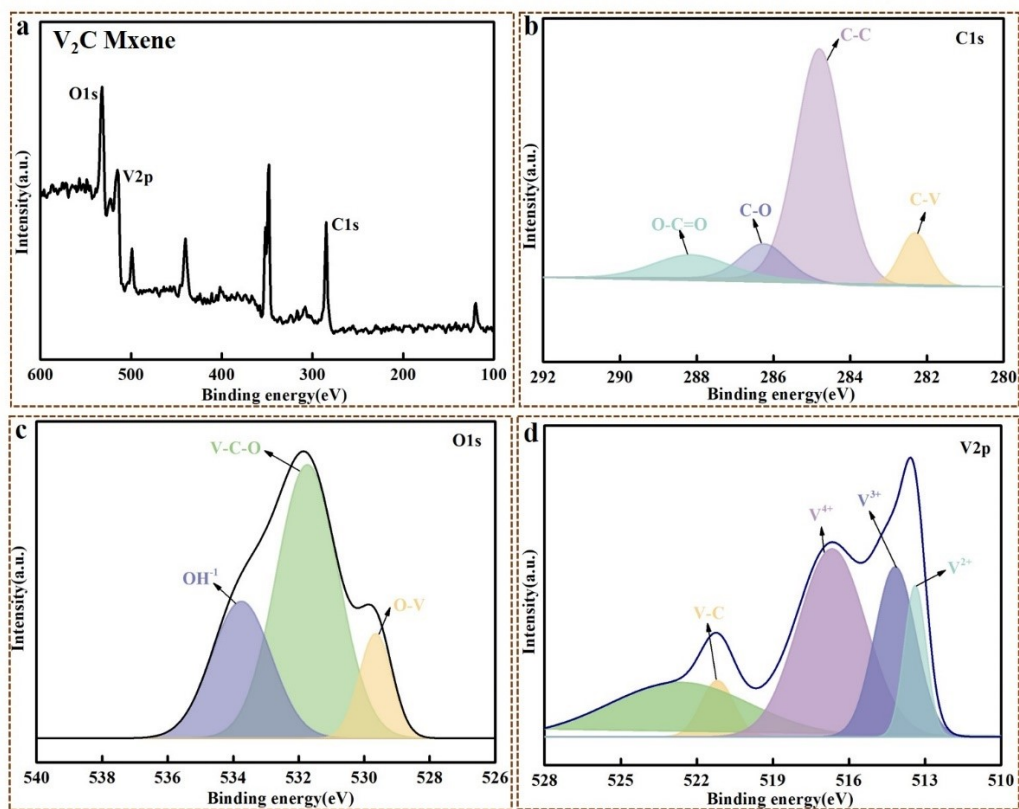

**Fig. S3** The XPS spectra of (a)  $V_2C$  Mxene; (b) C 1s; (c) O 1s; (d) V 2p

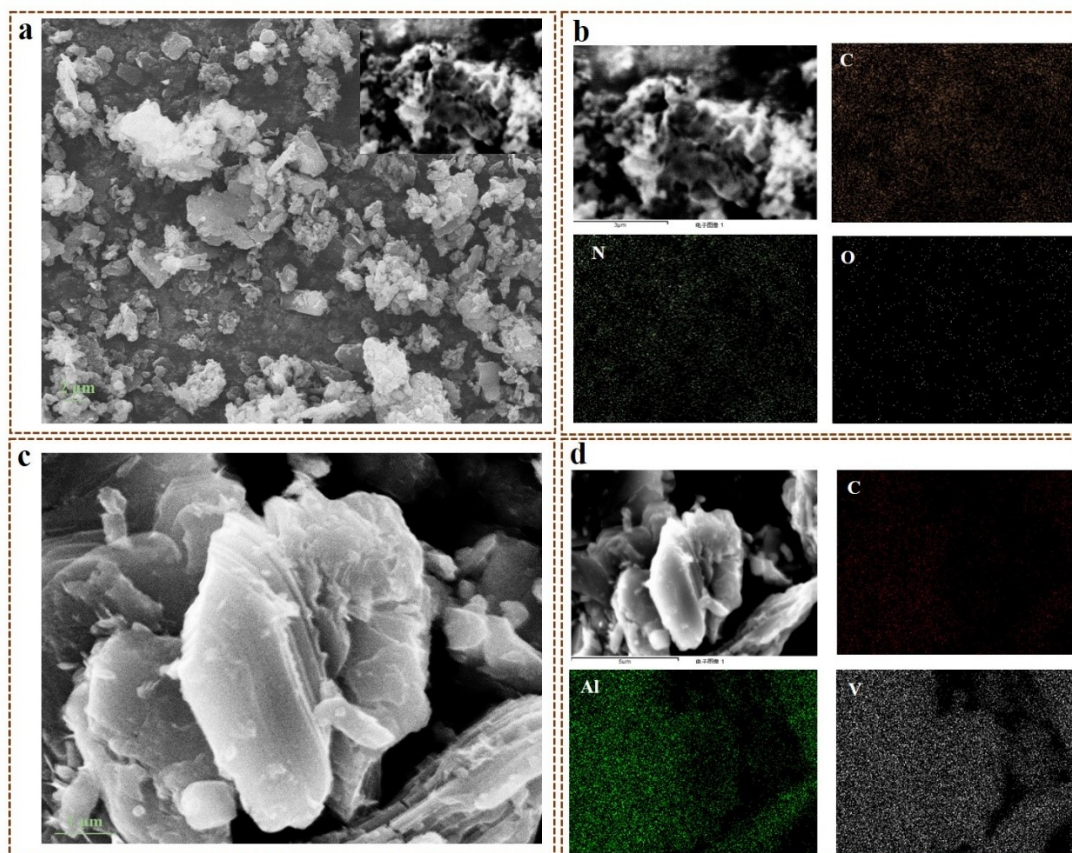

**Fig. S4** (a) SEM image of bulk  $g\text{-C}_3\text{N}_4$  (the insert image was  $g\text{-C}_3\text{N}_4$  nanosheet) and (b) corresponding EDX mapping of bulk  $g\text{-C}_3\text{N}_4$ ; (c) SEM image of  $\text{V}_2\text{AlC}$  and (d) corresponding EDX mapping of  $\text{V}_2\text{AlC}$

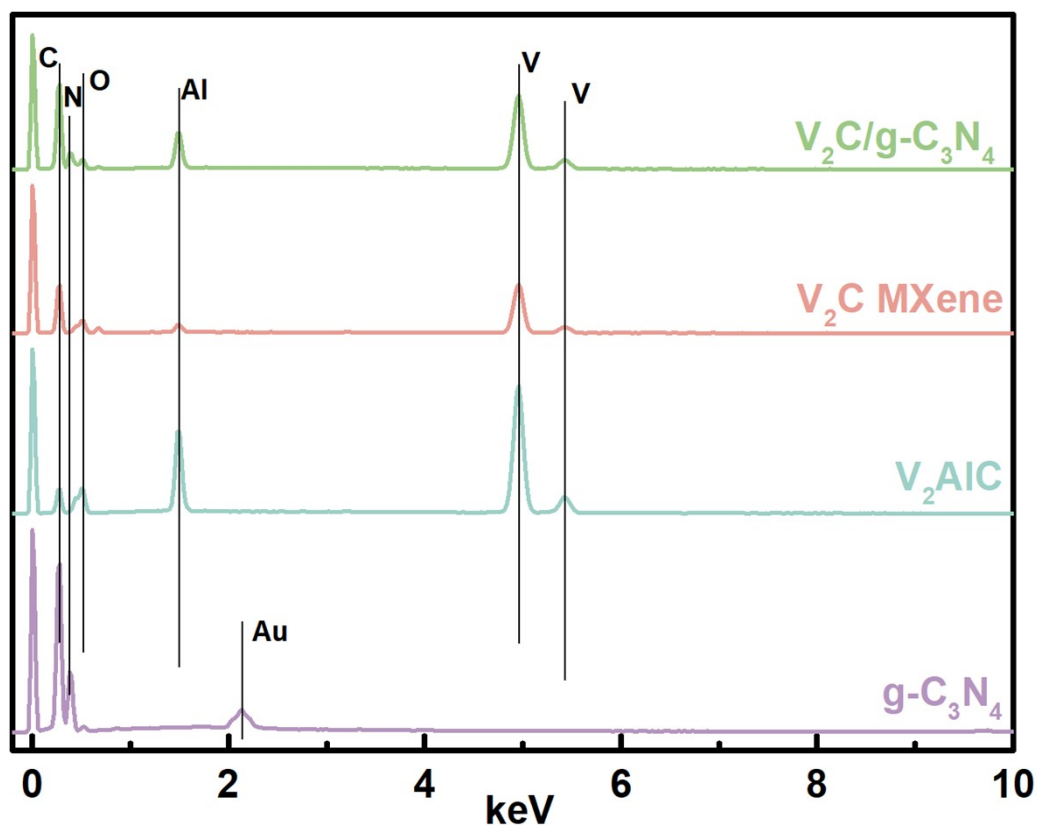

**Fig. S5** EDX plots of  $g\text{-C}_3\text{N}_4$ ,  $\text{V}_2\text{AlC}$ ,  $\text{V}_2\text{C}$  MXene and  $\text{V}_2\text{C}/g\text{-C}_3\text{N}_4$  heterojunction

**Table S1** The texture property of  $\text{V}_2\text{AlC}$  Max,  $\text{V}_2\text{C}$  MXene,  $g\text{-C}_3\text{N}_4$  and  $\text{V}_2\text{C}/g\text{-C}_3\text{N}_4$  heterojunctions

| Sample                                      | $S_{\text{BET}}(\text{m}^2/\text{g})$ | $V_p(\text{cm}^3/\text{g})$ | Pore Diameter (nm) |
|---------------------------------------------|---------------------------------------|-----------------------------|--------------------|
| $\text{V}_2\text{AlC}$ Max                  | 0.102                                 | 0.015                       | 10.86              |
| $\text{V}_2\text{C}$ MXene                  | 7.135                                 | 0.063                       | 13.94              |
| $g\text{-C}_3\text{N}_4$                    | 115.636                               | 0.47                        | 9.09               |
| $\text{V}_2\text{C}/g\text{-C}_3\text{N}_4$ | 70.122                                | 0.51                        | 14.64              |

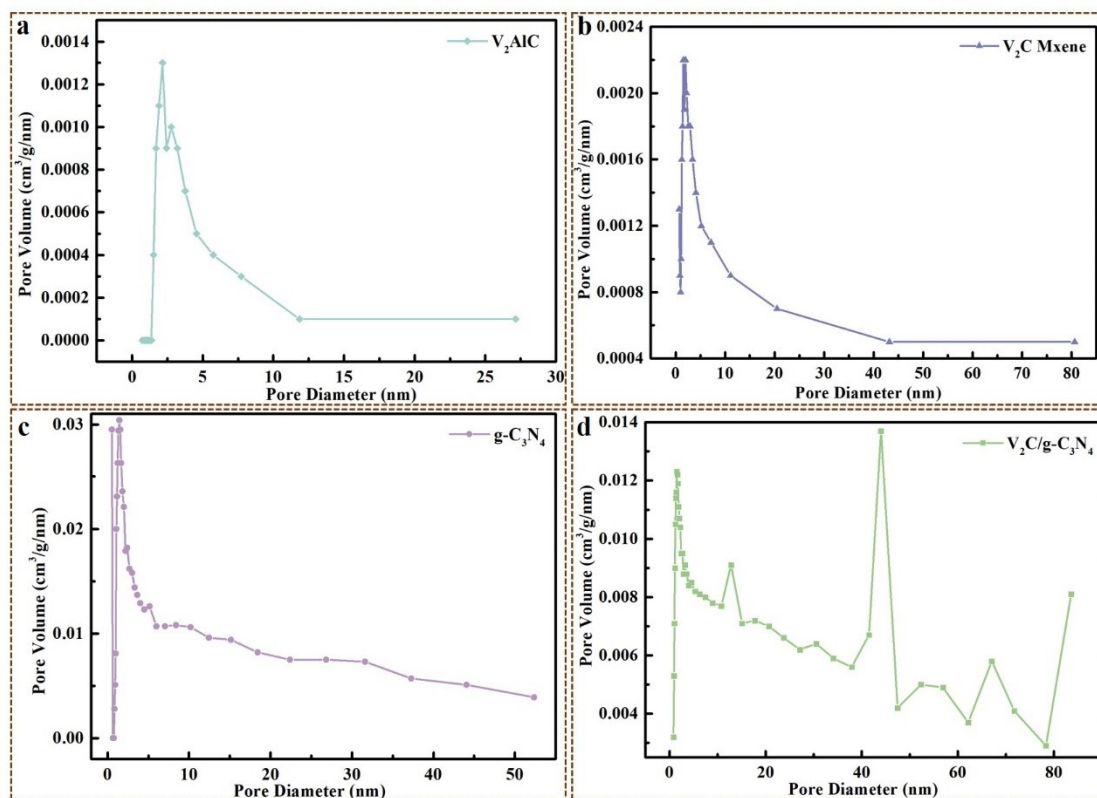

Fig. S6 BJH pore size distribution of (a)  $V_2AlC$  Max, (b)  $V_2C$  Mxene, (c)  $g-C_3N_4$  and (d)  $V_2C/g-C_3N_4$  heterojunction

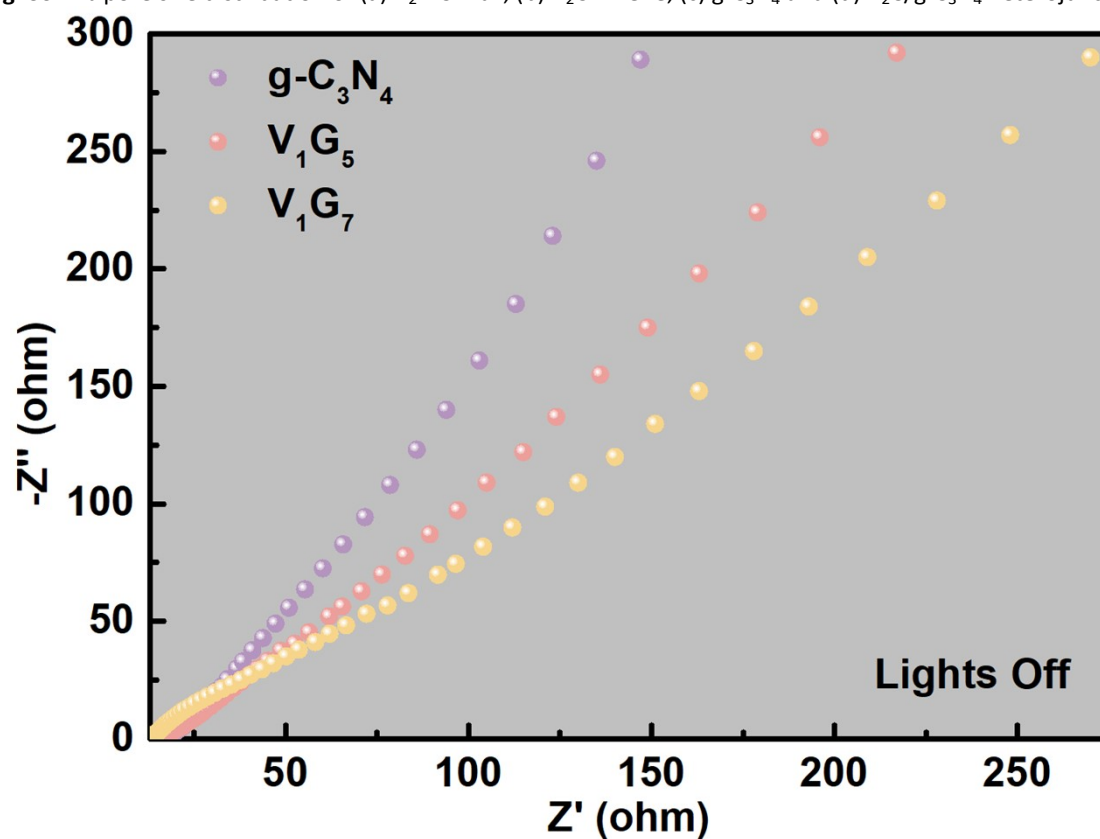

Fig. S7 Electrochemical impedance spectra (in the dark environment) of  $g-C_3N_4$ ,  $V_1G_5$  and  $V_1G_7$  heterojunctions

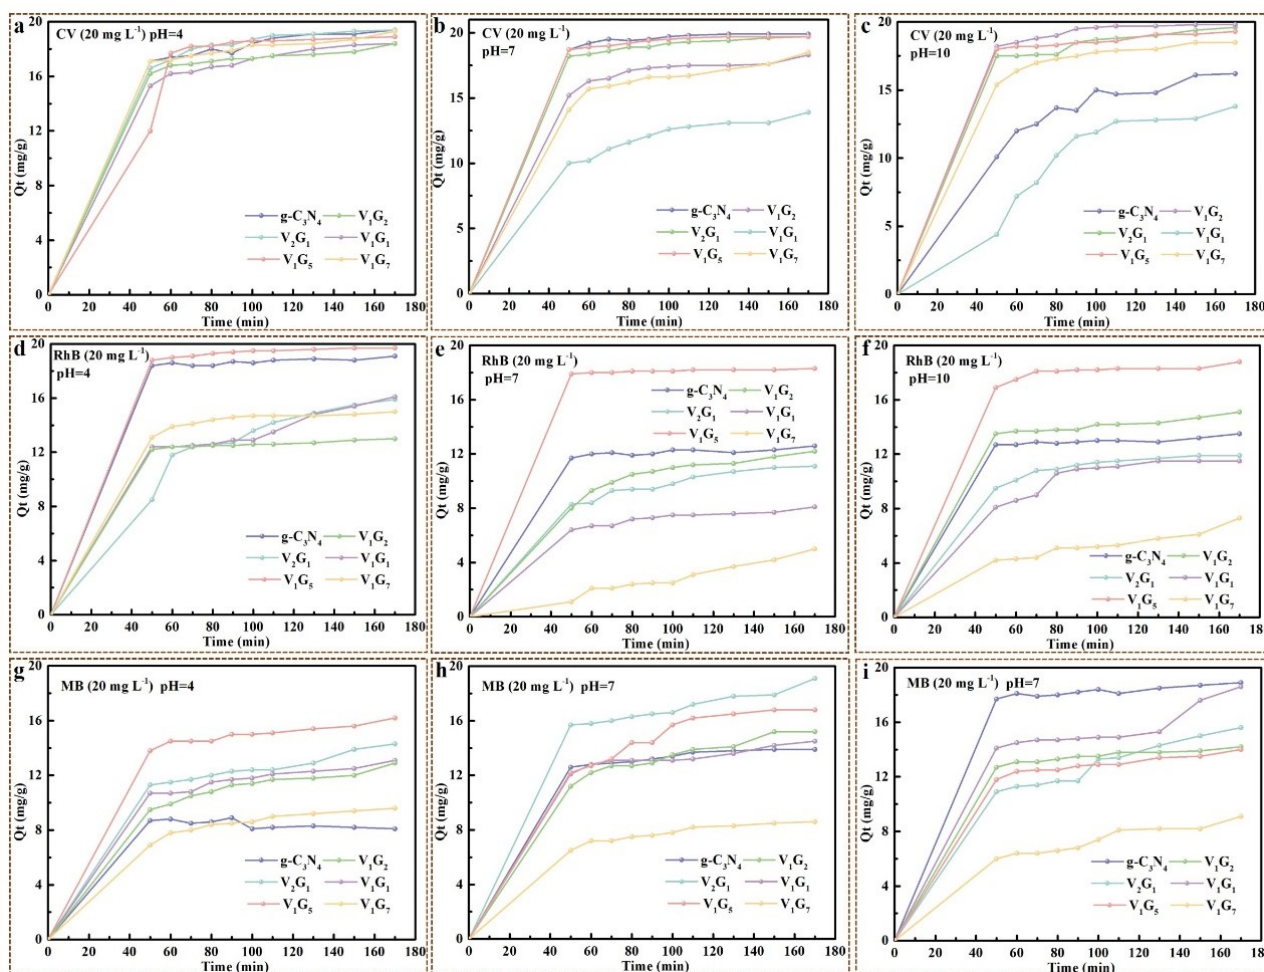

**Fig. S8** Adsorption capacity ( $Q_t$ ) of  $V_xG_y$  heterojunctions for CV (original content of  $20 \text{ mg L}^{-1}$ ) at (a) pH=4, (b) pH=7, (c) pH=10; for RhB (original content of  $20 \text{ mg L}^{-1}$ ) at (d) pH=4, (e) pH=7, (f) pH=10; for MB (original content of  $20 \text{ mg L}^{-1}$ ) at (g) pH=4, (h) pH=7, (i) pH=10.

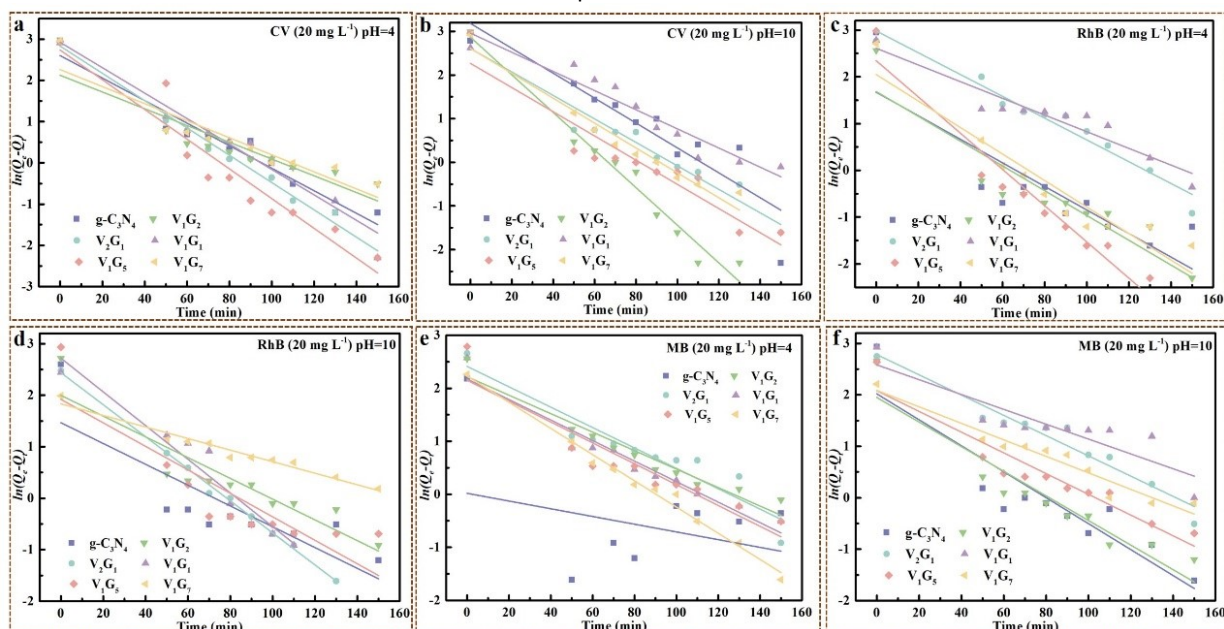

**Fig. S9** Adsorption kinetics on the adsorption of CV at (a) pH=4, (b) pH=10; RhB at (c) pH=4, (d) pH=10; MB at (e) pH=4, (f) pH=10 with the original contents of  $20 \text{ mg L}^{-1}$  onto  $V_xG_y$  heterojunctions fitted by the pseudo-first-order kinetic model

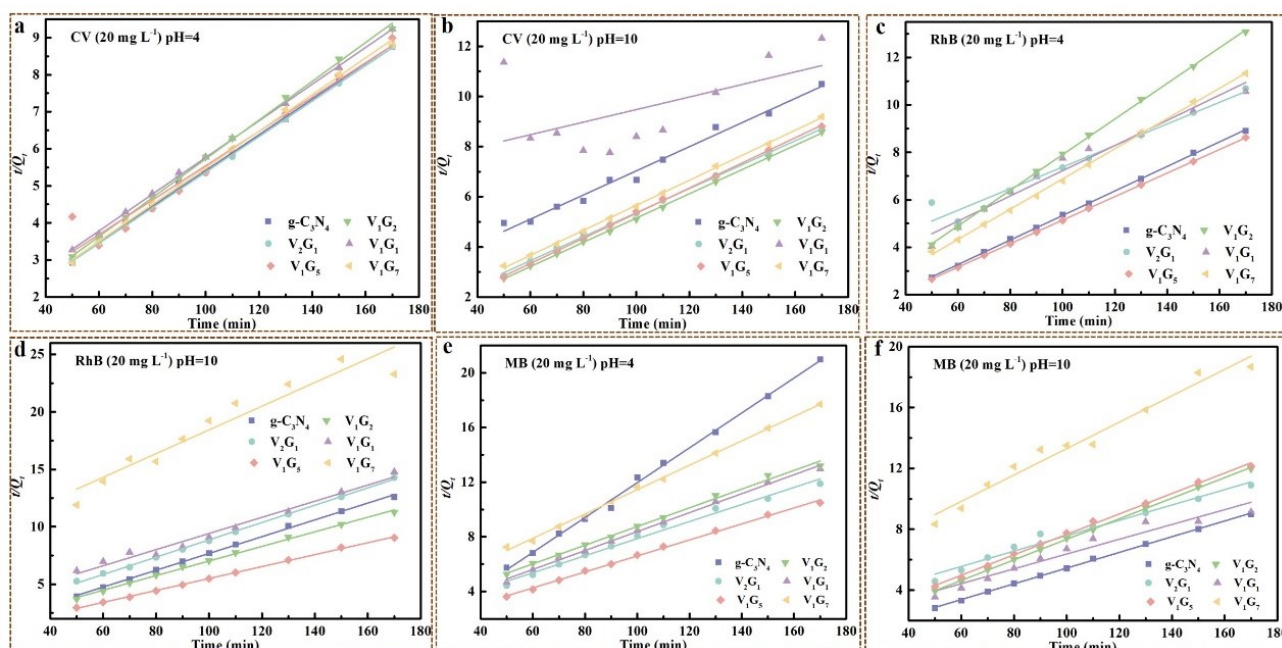

**Fig. S10** Adsorption kinetics on the adsorption of CV (original content of  $20 \text{ mg L}^{-1}$ ) at (a) pH=4, (b) pH=10; RhB (original content of  $20 \text{ mg L}^{-1}$ ) at (c) pH=4, (d) pH=10; MB (original content of  $20 \text{ mg L}^{-1}$ ) at (e) pH=4, (f) pH=10 onto  $V_xG_y$  heterojunctions fitted by the pseudo-second-order kinetic model

**Table S2** kinetic parameters of CV by  $V_xG_y$  heterojunctions (pH=4,  $20 \text{ mg L}^{-1}$ )

| $C_0$ ( $\text{mg L}^{-1}$ ) | Pseudo-first-order Kinetic Model           |                                            |                             |       | Pseudo-second-order Kinetic Model          |                                              |       |         |
|------------------------------|--------------------------------------------|--------------------------------------------|-----------------------------|-------|--------------------------------------------|----------------------------------------------|-------|---------|
|                              | $Q_{e, \text{exp}}$ ( $\text{mg g}^{-1}$ ) | $Q_{e, \text{cal}}$ ( $\text{mg g}^{-1}$ ) | $K_1$ ( $\text{min}^{-1}$ ) | $R^2$ | $Q_{e, \text{cal}}$ ( $\text{mg g}^{-1}$ ) | $K_2$ ( $\text{g mg}^{-1} \text{min}^{-1}$ ) | $R^2$ |         |
| $g\text{-C}_3\text{N}_4$     | 20                                         | 19.4                                       | 19.59                       | 0.027 | 0.93897                                    | 19.52                                        | 0.048 | 0.99865 |
| $V_2G_1$                     | 20                                         | 19.4                                       | 19.47                       | 0.033 | 0.98355                                    | 19.52                                        | 0.048 | 0.99956 |
| $V_1G_1$                     | 20                                         | 18.4                                       | 18.50                       | 0.031 | 0.94266                                    | 18.52                                        | 0.050 | 0.99938 |
| $V_1G_2$                     | 20                                         | 18.4                                       | 19.04                       | 0.020 | 0.81299                                    | 18.51                                        | 0.052 | 0.99863 |
| $V_1G_5$                     | 20                                         | 18.9                                       | 18.94                       | 0.036 | 0.89978                                    | 19.03                                        | 0.046 | 0.95461 |
| $V_1G_7$                     | 20                                         | 19.3                                       | 19.86                       | 0.021 | 0.84989                                    | 19.42                                        | 0.050 | 0.99855 |

**Table S3** kinetic parameters of CV by  $V_xG_y$  heterojunctions (pH=7,  $20 \text{ mg L}^{-1}$ )

| $C_0$ ( $\text{mg L}^{-1}$ ) | Pseudo-first-order Kinetic Model           |                                            |                             |       | Pseudo-second-order Kinetic Model          |                                              |       |         |
|------------------------------|--------------------------------------------|--------------------------------------------|-----------------------------|-------|--------------------------------------------|----------------------------------------------|-------|---------|
|                              | $Q_{e, \text{exp}}$ ( $\text{mg g}^{-1}$ ) | $Q_{e, \text{cal}}$ ( $\text{mg g}^{-1}$ ) | $K_1$ ( $\text{min}^{-1}$ ) | $R^2$ | $Q_{e, \text{cal}}$ ( $\text{mg g}^{-1}$ ) | $K_2$ ( $\text{g mg}^{-1} \text{min}^{-1}$ ) | $R^2$ |         |
| $g\text{-C}_3\text{N}_4$     | 20                                         | 19.9                                       | 20.10                       | 0.027 | 0.93897                                    | 20.02                                        | 0.049 | 0.99985 |
| $V_2G_1$                     | 20                                         | 19.7                                       | 19.77                       | 0.033 | 0.98355                                    | 19.82                                        | 0.049 | 0.99991 |
| $V_1G_1$                     | 20                                         | 13.9                                       | 13.97                       | 0.031 | 0.94266                                    | 13.99                                        | 0.061 | 0.99551 |
| $V_1G_2$                     | 20                                         | 18.3                                       | 18.93                       | 0.020 | 0.81299                                    | 18.41                                        | 0.052 | 0.99802 |
| $V_1G_5$                     | 20                                         | 19.7                                       | 19.74                       | 0.036 | 0.89978                                    | 19.82                                        | 0.049 | 0.99999 |
| $V_1G_7$                     | 20                                         | 18.5                                       | 19.04                       | 0.021 | 0.84989                                    | 18.62                                        | 0.049 | 0.99558 |

**Table S4** kinetic parameters of CV by  $V_xG_y$  heterojunctions (pH=10,  $20 \text{ mg L}^{-1}$ )

| $C_0$ ( $\text{mg L}^{-1}$ ) | Pseudo-first-order Kinetic Model           |                                            |                             |       | Pseudo-second-order Kinetic Model          |                                              |       |         |
|------------------------------|--------------------------------------------|--------------------------------------------|-----------------------------|-------|--------------------------------------------|----------------------------------------------|-------|---------|
|                              | $Q_{e, \text{exp}}$ ( $\text{mg g}^{-1}$ ) | $Q_{e, \text{cal}}$ ( $\text{mg g}^{-1}$ ) | $K_1$ ( $\text{min}^{-1}$ ) | $R^2$ | $Q_{e, \text{cal}}$ ( $\text{mg g}^{-1}$ ) | $K_2$ ( $\text{g mg}^{-1} \text{min}^{-1}$ ) | $R^2$ |         |
| $g\text{-C}_3\text{N}_4$     | 20                                         | 16.2                                       | 16.32                       | 0.029 | 0.81275                                    | 16.32                                        | 0.048 | 0.98498 |
| $V_2G_1$                     | 20                                         | 19.6                                       | 19.80                       | 0.027 | 0.935                                      | 19.72                                        | 0.048 | 0.99859 |
| $V_1G_1$                     | 20                                         | 13.8                                       | 14.13                       | 0.022 | 0.90501                                    | 14.03                                        | 0.025 | 0.24713 |
| $V_1G_2$                     | 20                                         | 19.8                                       | 19.81                       | 0.043 | 0.96602                                    | 19.92                                        | 0.048 | 0.99957 |
| $V_1G_5$                     | 20                                         | 19.3                                       | 19.47                       | 0.028 | 0.87406                                    | 19.42                                        | 0.050 | 0.99939 |
| $V_1G_7$                     | 20                                         | 18.5                                       | 18.63                       | 0.029 | 0.95732                                    | 18.62                                        | 0.050 | 0.99935 |

**Table S5** kinetic parameters of RhB by  $V_xG_y$  heterojunctions (pH=4,  $20 \text{ mg L}^{-1}$ )

| $C_0$ ( $\text{mg L}^{-1}$ ) | Pseudo-first-order Kinetic Model           |                                            |                             |       | Pseudo-second-order Kinetic Model          |                                              |       |
|------------------------------|--------------------------------------------|--------------------------------------------|-----------------------------|-------|--------------------------------------------|----------------------------------------------|-------|
|                              | $Q_{e, \text{exp}}$ ( $\text{mg g}^{-1}$ ) | $Q_{e, \text{cal}}$ ( $\text{mg g}^{-1}$ ) | $K_1$ ( $\text{min}^{-1}$ ) | $R^2$ | $Q_{e, \text{cal}}$ ( $\text{mg g}^{-1}$ ) | $K_2$ ( $\text{g mg}^{-1} \text{min}^{-1}$ ) | $R^2$ |



|            |    |      |       |       |         |       |       |         |
|------------|----|------|-------|-------|---------|-------|-------|---------|
| $g-C_3N_4$ | 20 | 19.1 | 19.38 | 0.025 | 0.68938 | 19.21 | 0.052 | 0.9996  |
| $V_2G_1$   | 20 | 15.9 | 16.22 | 0.023 | 0.95019 | 16.03 | 0.046 | 0.96105 |
| $V_1G_1$   | 20 | 16.1 | 16.89 | 0.018 | 0.88771 | 16.21 | 0.053 | 0.97009 |
| $V_1G_2$   | 20 | 13   | 13.13 | 0.027 | 0.82867 | 13.08 | 0.075 | 0.99958 |
| $V_1G_5$   | 20 | 19.7 | 19.73 | 0.039 | 0.93138 | 19.82 | 0.050 | 0.99998 |
| $V_1G_7$   | 20 | 15   | 15.13 | 0.028 | 0.88404 | 15.09 | 0.064 | 0.99923 |

**Table S6** kinetic parameters of RhB by  $V_xG_y$  heterojunctions (pH=7, 20 mg L<sup>-1</sup>)

| $C_0$ (mg L <sup>-1</sup> ) | Pseudo-first-order Kinetic Model  |                                   |                            |       | Pseudo-second-order Kinetic Model |                                               |        |         |
|-----------------------------|-----------------------------------|-----------------------------------|----------------------------|-------|-----------------------------------|-----------------------------------------------|--------|---------|
|                             | $Q_{e,exp}$ (mg g <sup>-1</sup> ) | $Q_{e,cal}$ (mg g <sup>-1</sup> ) | $K_1$ (min <sup>-1</sup> ) | $R^2$ | $Q_{e,cal}$ (mg g <sup>-1</sup> ) | $K_2$ (g mg <sup>-1</sup> min <sup>-1</sup> ) | $R^2$  |         |
| $g-C_3N_4$                  | 20                                | 12.6                              | 12.96                      | 0.021 | 0.6527                            | 12.67                                         | 0.078  | 0.99854 |
| $V_2G_1$                    | 20                                | 11.1                              | 11.20                      | 0.028 | 0.91449                           | 11.18                                         | 0.075  | 0.99574 |
| $V_1G_1$                    | 20                                | 8.1                               | 8.43                       | 0.019 | 0.91749                           | 8.15                                          | 0.112  | 0.99687 |
| $V_1G_2$                    | 20                                | 12.2                              | 12.50                      | 0.022 | 0.97868                           | 12.29                                         | 0.068  | 0.99359 |
| $V_1G_5$                    | 20                                | 18.3                              | 18.39                      | 0.031 | 0.73205                           | 18.41                                         | 0.054  | 0.99997 |
| $V_1G_7$                    | 20                                | 5                                 | 5.75                       | 0.012 | 0.88355                           | 4.60                                          | -0.016 | -0.1022 |

**Table S7** kinetic parameters of RhB by  $V_xG_y$  heterojunctions (pH=10, 20 mg L<sup>-1</sup>)

| $C_0$ (mg L <sup>-1</sup> ) | Pseudo-first-order Kinetic Model  |                                   |                            |       | Pseudo-second-order Kinetic Model |                                               |       |         |
|-----------------------------|-----------------------------------|-----------------------------------|----------------------------|-------|-----------------------------------|-----------------------------------------------|-------|---------|
|                             | $Q_{e,exp}$ (mg g <sup>-1</sup> ) | $Q_{e,cal}$ (mg g <sup>-1</sup> ) | $K_1$ (min <sup>-1</sup> ) | $R^2$ | $Q_{e,cal}$ (mg g <sup>-1</sup> ) | $K_2$ (g mg <sup>-1</sup> min <sup>-1</sup> ) | $R^2$ |         |
| $g-C_3N_4$                  | 20                                | 13.5                              | 13.97                      | 0.020 | 0.65741                           | 13.58                                         | 0.073 | 0.99847 |
| $V_2G_1$                    | 20                                | 11.9                              | 11.96                      | 0.031 | 0.99629                           | 11.98                                         | 0.075 | 0.99871 |
| $V_1G_1$                    | 20                                | 11.5                              | 11.54                      | 0.033 | 0.92992                           | 11.58                                         | 0.070 | 0.9796  |
| $V_1G_2$                    | 20                                | 15.1                              | 15.62                      | 0.020 | 0.82096                           | 15.19                                         | 0.064 | 0.9974  |
| $V_1G_5$                    | 20                                | 18.8                              | 19.18                      | 0.023 | 0.72631                           | 18.91                                         | 0.052 | 0.99903 |
| $V_1G_7$                    | 20                                | 7.3                               | 8.63                       | 0.011 | 0.95697                           | 7.36                                          | 0.103 | 0.91208 |

**Table S8** kinetic parameters of MB by  $V_xG_y$  heterojunctions (pH=4, 20 mg L<sup>-1</sup>)

| $C_0$ (mg L <sup>-1</sup> ) | Pseudo-first-order Kinetic Model  |                                   |                            |        | Pseudo-second-order Kinetic Model |                                               |       |         |
|-----------------------------|-----------------------------------|-----------------------------------|----------------------------|--------|-----------------------------------|-----------------------------------------------|-------|---------|
|                             | $Q_{e,exp}$ (mg g <sup>-1</sup> ) | $Q_{e,cal}$ (mg g <sup>-1</sup> ) | $K_1$ (min <sup>-1</sup> ) | $R^2$  | $Q_{e,cal}$ (mg g <sup>-1</sup> ) | $K_2$ (g mg <sup>-1</sup> min <sup>-1</sup> ) | $R^2$ |         |
| $g-C_3N_4$                  | 20                                | 8.1                               | 11.39                      | 0.0073 | -0.0628                           | 8.30                                          | 0.128 | 0.9971  |
| $V_2G_1$                    | 20                                | 14.3                              | 14.89                      | 0.019  | 0.87333                           | 14.39                                         | 0.062 | 0.98784 |
| $V_1G_1$                    | 20                                | 13.1                              | 13.64                      | 0.019  | 0.93378                           | 13.18                                         | 0.069 | 0.9966  |
| $V_1G_2$                    | 20                                | 12.9                              | 13.66                      | 0.017  | 0.93355                           | 12.99                                         | 0.068 | 0.99476 |
| $V_1G_5$                    | 20                                | 16.2                              | 16.76                      | 0.020  | 0.85924                           | 16.30                                         | 0.059 | 0.99773 |
| $V_1G_7$                    | 20                                | 9.6                               | 9.74                       | 0.025  | 0.9866                            | 9.67                                          | 0.089 | 0.99826 |

**Table S9** kinetic parameters of MB by  $V_xG_y$  heterojunctions (pH=7, 20 mg L<sup>-1</sup>)

| $C_0$ (mg L <sup>-1</sup> ) | Pseudo-first-order Kinetic Model  |                                   |                            |       | Pseudo-second-order Kinetic Model |                                               |       |         |
|-----------------------------|-----------------------------------|-----------------------------------|----------------------------|-------|-----------------------------------|-----------------------------------------------|-------|---------|
|                             | $Q_{e,exp}$ (mg g <sup>-1</sup> ) | $Q_{e,cal}$ (mg g <sup>-1</sup> ) | $K_1$ (min <sup>-1</sup> ) | $R^2$ | $Q_{e,cal}$ (mg g <sup>-1</sup> ) | $K_2$ (g mg <sup>-1</sup> min <sup>-1</sup> ) | $R^2$ |         |
| $g-C_3N_4$                  | 20                                | 13.9                              | 13.94                      | 0.035 | 0.94839                           | 13.99                                         | 0.068 | 0.99947 |
| $V_2G_1$                    | 20                                | 19.1                              | 20.22                      | 0.017 | 0.87692                           | 19.22                                         | 0.048 | 0.99188 |
| $V_1G_1$                    | 20                                | 14.5                              | 14.92                      | 0.021 | 0.85077                           | 14.59                                         | 0.065 | 0.99489 |
| $V_1G_2$                    | 20                                | 15.2                              | 15.72                      | 0.020 | 0.95328                           | 15.30                                         | 0.056 | 0.99418 |
| $V_1G_5$                    | 20                                | 16.8                              | 16.90                      | 0.030 | 0.93135                           | 16.92                                         | 0.048 | 0.992   |
| $V_1G_7$                    | 20                                | 8.6                               | 8.67                       | 0.028 | 0.96278                           | 8.66                                          | 0.101 | 0.99816 |

**Table S10** kinetic parameters of MB by  $V_xG_y$  heterojunctions (pH=10, 20 mg L<sup>-1</sup>)

| $C_0$ (mg L <sup>-1</sup> ) | Pseudo-first-order Kinetic Model  |                                   |                            |       | Pseudo-second-order Kinetic Model |                                               |       |         |
|-----------------------------|-----------------------------------|-----------------------------------|----------------------------|-------|-----------------------------------|-----------------------------------------------|-------|---------|
|                             | $Q_{e,exp}$ (mg g <sup>-1</sup> ) | $Q_{e,cal}$ (mg g <sup>-1</sup> ) | $K_1$ (min <sup>-1</sup> ) | $R^2$ | $Q_{e,cal}$ (mg g <sup>-1</sup> ) | $K_2$ (g mg <sup>-1</sup> min <sup>-1</sup> ) | $R^2$ |         |
| $g-C_3N_4$                  | 20                                | 18.9                              | 19.17                      | 0.025 | 0.80034                           | 19.01                                         | 0.052 | 0.99921 |
| $V_2G_1$                    | 20                                | 15.6                              | 16.14                      | 0.020 | 0.93686                           | 15.71                                         | 0.051 | 0.97465 |
| $V_1G_1$                    | 20                                | 18.6                              | 20.50                      | 0.014 | 0.76007                           | 18.72                                         | 0.049 | 0.9471  |
| $V_1G_2$                    | 20                                | 14.2                              | 14.44                      | 0.024 | 0.8747                            | 14.29                                         | 0.068 | 0.99947 |
| $V_1G_5$                    | 20                                | 14                                | 14.48                      | 0.020 | 0.88601                           | 14.09                                         | 0.067 | 0.99756 |
| $V_1G_7$                    | 20                                | 9.1                               | 9.74                       | 0.016 | 0.93286                           | 9.17                                          | 0.087 | 0.9695  |

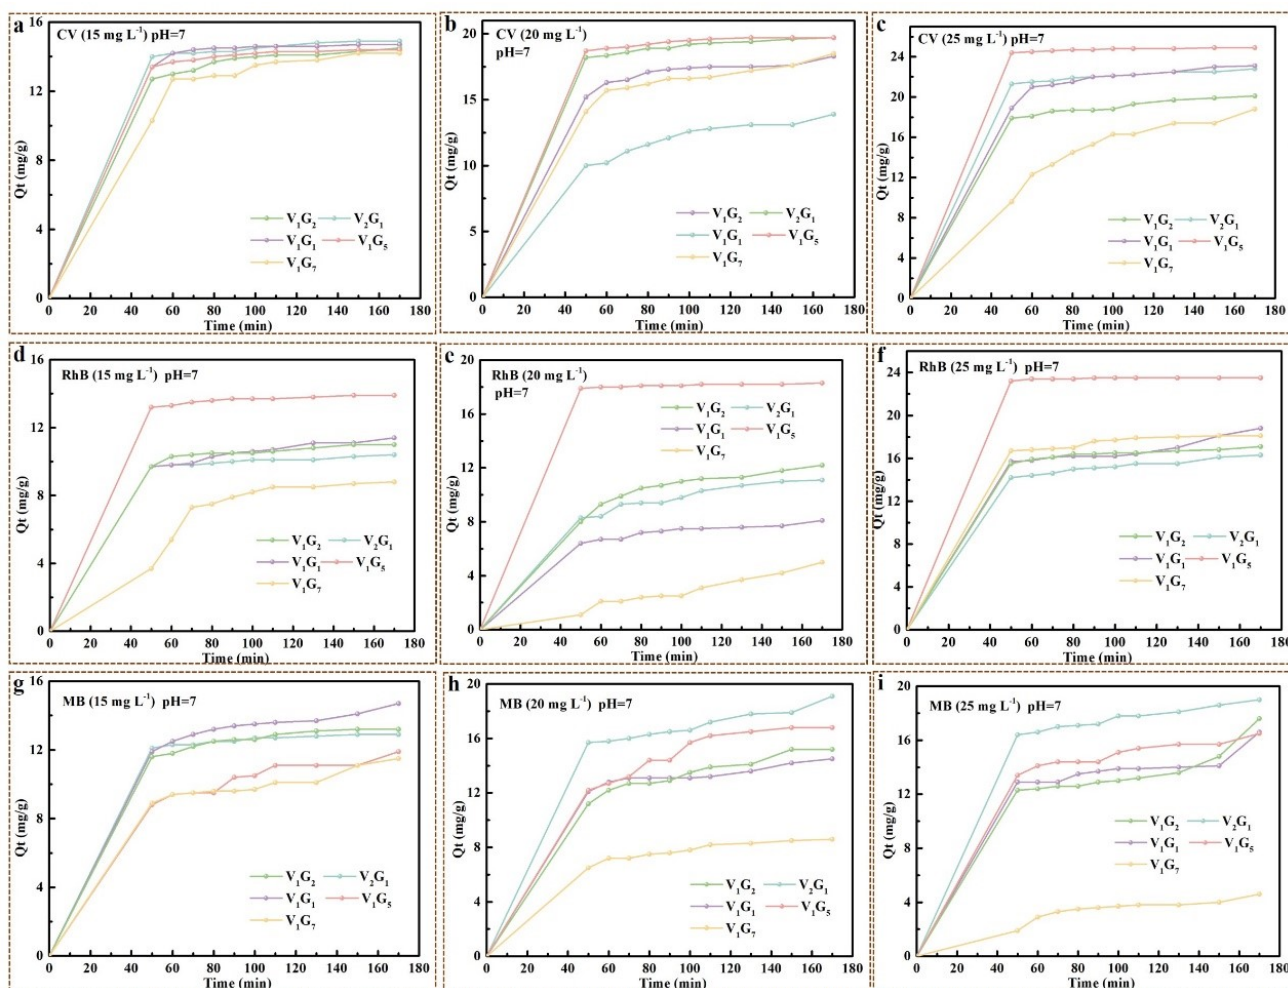

**Fig. S11** Adsorption capacity ( $Q_t$ ) of  $V_xG_y$  heterojunctions for CV (pH=7) with the original content of (a)  $15 \text{ mg L}^{-1}$ , (b)  $20 \text{ mg L}^{-1}$ , (c)  $25 \text{ mg L}^{-1}$ ; for RhB (pH=7) with the original content of (d)  $15 \text{ mg L}^{-1}$ , (e)  $20 \text{ mg L}^{-1}$ , (f)  $25 \text{ mg L}^{-1}$ ; for MB (pH=7) with the original content of (g)  $15 \text{ mg L}^{-1}$ , (h)  $20 \text{ mg L}^{-1}$ , (i)  $25 \text{ mg L}^{-1}$ .

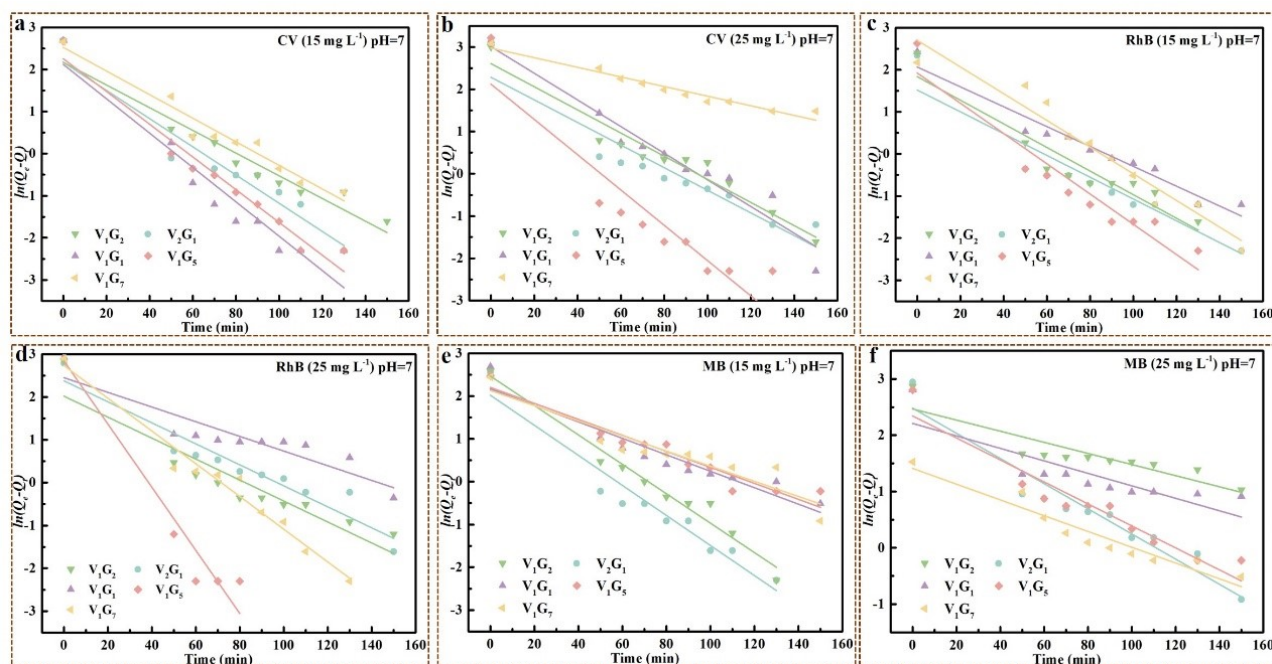

**Fig. S12** Adsorption kinetics on the adsorption of CV with the original content of (a) 15 mg L<sup>-1</sup>, (b) 25 mg L<sup>-1</sup>; RhB with the original content of (c) 15 mg L<sup>-1</sup>, (d) 25 mg L<sup>-1</sup>; MB with the original content of (e) 15 mg L<sup>-1</sup>, (f) 25 mg L<sup>-1</sup> onto V<sub>x</sub>G<sub>y</sub> heterojunctions at pH value of 7 fitted by the pseudo-first-order kinetic model

**Table S11** kinetic parameters of CV by V<sub>x</sub>G<sub>y</sub> heterojunctions (pH=7, 15 mg L<sup>-1</sup>)

| C <sub>0</sub> (mg L <sup>-1</sup> ) | Pseudo-first-order Kinetic Model          |                                           |                                     |                | Pseudo-second-order Kinetic Model         |                                                        |                |         |
|--------------------------------------|-------------------------------------------|-------------------------------------------|-------------------------------------|----------------|-------------------------------------------|--------------------------------------------------------|----------------|---------|
|                                      | Q <sub>e, exp</sub> (mg g <sup>-1</sup> ) | Q <sub>e, cal</sub> (mg g <sup>-1</sup> ) | K <sub>1</sub> (min <sup>-1</sup> ) | R <sup>2</sup> | Q <sub>e, cal</sub> (mg g <sup>-1</sup> ) | K <sub>2</sub> (g mg <sup>-1</sup> min <sup>-1</sup> ) | R <sup>2</sup> |         |
| V <sub>2</sub> G <sub>1</sub>        | 15                                        | 14.9                                      | 14.95                               | 0.03352        | 0.90111                                   | 14.99                                                  | 0.06489        | 0.99971 |
| V <sub>1</sub> G <sub>1</sub>        | 15                                        | 14.7                                      | 14.71                               | 0.04083        | 0.90136                                   | 14.79                                                  | 0.06615        | 0.99941 |
| V <sub>1</sub> G <sub>2</sub>        | 15                                        | 14.5                                      | 14.65                               | 0.02698        | 0.93453                                   | 14.59                                                  | 0.06516        | 0.99955 |
| V <sub>1</sub> G <sub>5</sub>        | 15                                        | 14.4                                      | 14.42                               | 0.03891        | 0.95752                                   | 14.49                                                  | 0.06721        | 0.9999  |
| V <sub>1</sub> G <sub>7</sub>        | 15                                        | 14.2                                      | 14.32                               | 0.02803        | 0.94933                                   | 14.29                                                  | 0.0621         | 0.99245 |

**Table S12** kinetic parameters of CV by V<sub>x</sub>G<sub>y</sub> heterojunctions (pH=7, 25 mg L<sup>-1</sup>)

| C <sub>0</sub> (mg L <sup>-1</sup> ) | Pseudo-first-order Kinetic Model          |                                           |                                     |                | Pseudo-second-order Kinetic Model         |                                                        |                |         |
|--------------------------------------|-------------------------------------------|-------------------------------------------|-------------------------------------|----------------|-------------------------------------------|--------------------------------------------------------|----------------|---------|
|                                      | Q <sub>e, exp</sub> (mg g <sup>-1</sup> ) | Q <sub>e, cal</sub> (mg g <sup>-1</sup> ) | K <sub>1</sub> (min <sup>-1</sup> ) | R <sup>2</sup> | Q <sub>e, cal</sub> (mg g <sup>-1</sup> ) | K <sub>2</sub> (g mg <sup>-1</sup> min <sup>-1</sup> ) | R <sup>2</sup> |         |
| V <sub>2</sub> G <sub>1</sub>        | 25                                        | 22.8                                      | 23.04                               | 0.02677        | 0.86549                                   | 22.94                                                  | 0.04265        | 0.99982 |
| V <sub>1</sub> G <sub>1</sub>        | 25                                        | 23.1                                      | 23.21                               | 0.03156        | 0.93466                                   | 23.25                                                  | 0.04013        | 0.99878 |
| V <sub>1</sub> G <sub>2</sub>        | 25                                        | 20.1                                      | 20.29                               | 0.0274         | 0.93502                                   | 20.22                                                  | 0.04697        | 0.99903 |
| V <sub>1</sub> G <sub>5</sub>        | 25                                        | 24.9                                      | 24.92                               | 0.04179        | 0.8349                                    | 25.05                                                  | 0.03981        | 0.99999 |
| V <sub>1</sub> G <sub>7</sub>        | 25                                        | 18.8                                      | 21.97                               | 0.01138        | 0.94981                                   | 18.96                                                  | 0.03659        | 0.96075 |

**Table S13** kinetic parameters of RhB by V<sub>x</sub>G<sub>y</sub> heterojunctions (pH=7, 15 mg L<sup>-1</sup>)

| C <sub>0</sub> (mg L <sup>-1</sup> ) | Pseudo-first-order Kinetic Model          |                                           |                                     |                | Pseudo-second-order Kinetic Model         |                                                        |                |         |
|--------------------------------------|-------------------------------------------|-------------------------------------------|-------------------------------------|----------------|-------------------------------------------|--------------------------------------------------------|----------------|---------|
|                                      | Q <sub>e, exp</sub> (mg g <sup>-1</sup> ) | Q <sub>e, cal</sub> (mg g <sup>-1</sup> ) | K <sub>1</sub> (min <sup>-1</sup> ) | R <sup>2</sup> | Q <sub>e, cal</sub> (mg g <sup>-1</sup> ) | K <sub>2</sub> (g mg <sup>-1</sup> min <sup>-1</sup> ) | R <sup>2</sup> |         |
| V <sub>2</sub> G <sub>1</sub>        | 15                                        | 10.4                                      | 10.52                               | 0.0259         | 0.84439                                   | 10.46                                                  | 0.09351        | 0.99953 |
| V <sub>1</sub> G <sub>1</sub>        | 15                                        | 11.4                                      | 11.61                               | 0.02361        | 0.94714                                   | 11.47                                                  | 0.08087        | 0.99887 |
| V <sub>1</sub> G <sub>2</sub>        | 15                                        | 11                                        | 11.09                               | 0.02807        | 0.88116                                   | 11.07                                                  | 0.0866         | 0.99929 |
| V <sub>1</sub> G <sub>5</sub>        | 15                                        | 13.9                                      | 13.93                               | 0.03596        | 0.89928                                   | 13.98                                                  | 0.07028        | 0.99995 |
| V <sub>1</sub> G <sub>7</sub>        | 15                                        | 8.8                                       | 8.84                                | 0.03173        | 0.9345                                    | 8.89                                                   | 0.06726        | 0.69462 |

**Table S14** kinetic parameters of RhB by V<sub>x</sub>G<sub>y</sub> heterojunctions (pH=7, 25 mg L<sup>-1</sup>)

| C <sub>0</sub> (mg L <sup>-1</sup> ) | Pseudo-first-order Kinetic Model          |                                           |                                     |                | Pseudo-second-order Kinetic Model         |                                                        |                |         |
|--------------------------------------|-------------------------------------------|-------------------------------------------|-------------------------------------|----------------|-------------------------------------------|--------------------------------------------------------|----------------|---------|
|                                      | Q <sub>e, exp</sub> (mg g <sup>-1</sup> ) | Q <sub>e, cal</sub> (mg g <sup>-1</sup> ) | K <sub>1</sub> (min <sup>-1</sup> ) | R <sup>2</sup> | Q <sub>e, cal</sub> (mg g <sup>-1</sup> ) | K <sub>2</sub> (g mg <sup>-1</sup> min <sup>-1</sup> ) | R <sup>2</sup> |         |
| V <sub>2</sub> G <sub>1</sub>        | 25                                        | 16.3                                      | 16.56                               | 0.02453        | 0.90353                                   | 16.40                                                  | 0.0576         | 0.99856 |
| V <sub>1</sub> G <sub>1</sub>        | 25                                        | 18.8                                      | 19.88                               | 0.01714        | 0.8119                                    | 18.92                                                  | 0.04955        | 0.98536 |
| V <sub>1</sub> G <sub>2</sub>        | 25                                        | 17.1                                      | 17.37                               | 0.02449        | 0.85089                                   | 17.20                                                  | 0.05661        | 0.99967 |
| V <sub>1</sub> G <sub>5</sub>        | 25                                        | 23.5                                      | 23.50                               | 0.07374        | 0.92168                                   | 23.64                                                  | 0.04237        | 0.99998 |
| V <sub>1</sub> G <sub>7</sub>        | 25                                        | 18.1                                      | 18.13                               | 0.03822        | 0.96475                                   | 18.21                                                  | 0.0526         | 0.99945 |

**Table S15** kinetic parameters of MB by V<sub>x</sub>G<sub>y</sub> heterojunctions (pH=7, 15 mg L<sup>-1</sup>)

| C <sub>0</sub> (mg L <sup>-1</sup> ) | Pseudo-first-order Kinetic Model          |                                           |                                     |                | Pseudo-second-order Kinetic Model         |                                                        |                |         |
|--------------------------------------|-------------------------------------------|-------------------------------------------|-------------------------------------|----------------|-------------------------------------------|--------------------------------------------------------|----------------|---------|
|                                      | Q <sub>e, exp</sub> (mg g <sup>-1</sup> ) | Q <sub>e, cal</sub> (mg g <sup>-1</sup> ) | K <sub>1</sub> (min <sup>-1</sup> ) | R <sup>2</sup> | Q <sub>e, cal</sub> (mg g <sup>-1</sup> ) | K <sub>2</sub> (g mg <sup>-1</sup> min <sup>-1</sup> ) | R <sup>2</sup> |         |
| V <sub>2</sub> G <sub>1</sub>        | 15                                        | 12.9                                      | 12.93                               | 0.03513        | 0.93206                                   | 12.98                                                  | 0.07508        | 0.9999  |
| V <sub>1</sub> G <sub>1</sub>        | 15                                        | 14.7                                      | 15.28                               | 0.01924        | 0.89199                                   | 14.79                                                  | 0.06331        | 0.9974  |
| V <sub>1</sub> G <sub>2</sub>        | 15                                        | 13.2                                      | 13.24                               | 0.03438        | 0.96514                                   | 13.28                                                  | 0.07076        | 0.99965 |
| V <sub>1</sub> G <sub>5</sub>        | 15                                        | 11.9                                      | 12.42                               | 0.01869        | 0.91954                                   | 11.98                                                  | 0.07309        | 0.99154 |
| V <sub>1</sub> G <sub>7</sub>        | 15                                        | 11.5                                      | 12.10                               | 0.01768        | 0.84378                                   | 11.57                                                  | 0.07836        | 0.98159 |

**Table S16** kinetic parameters of MB by V<sub>x</sub>G<sub>y</sub> heterojunctions (pH=7, 25 mg L<sup>-1</sup>)

| C <sub>0</sub> (mg L <sup>-1</sup> ) | Pseudo-first-order Kinetic Model          |                                           |                                     |                | Pseudo-second-order Kinetic Model         |                                                        |                |         |
|--------------------------------------|-------------------------------------------|-------------------------------------------|-------------------------------------|----------------|-------------------------------------------|--------------------------------------------------------|----------------|---------|
|                                      | Q <sub>e, exp</sub> (mg g <sup>-1</sup> ) | Q <sub>e, cal</sub> (mg g <sup>-1</sup> ) | K <sub>1</sub> (min <sup>-1</sup> ) | R <sup>2</sup> | Q <sub>e, cal</sub> (mg g <sup>-1</sup> ) | K <sub>2</sub> (g mg <sup>-1</sup> min <sup>-1</sup> ) | R <sup>2</sup> |         |
| V <sub>2</sub> G <sub>1</sub>        | 25                                        | 19                                        | 19.44                               | 0.02234        | 0.91727                                   | 19.12                                                  | 0.04922        | 0.99823 |
| V <sub>1</sub> G <sub>1</sub>        | 25                                        | 16.6                                      | 19.58                               | 0.01108        | 0.68271                                   | 16.70                                                  | 0.05817        | 0.96205 |
| V <sub>1</sub> G <sub>2</sub>        | 25                                        | 17.6                                      | 21.64                               | 0.00987        | 0.77785                                   | 17.71                                                  | 0.05181        | 0.91061 |
| V <sub>1</sub> G <sub>5</sub>        | 25                                        | 16.5                                      | 17.12                               | 0.01953        | 0.90457                                   | 16.60                                                  | 0.05587        | 0.99637 |
| V <sub>1</sub> G <sub>7</sub>        | 25                                        | 18.4                                      | 20.28                               | 0.014          | 0.91224                                   | 18.44                                                  | 0.14472        | 0.81372 |

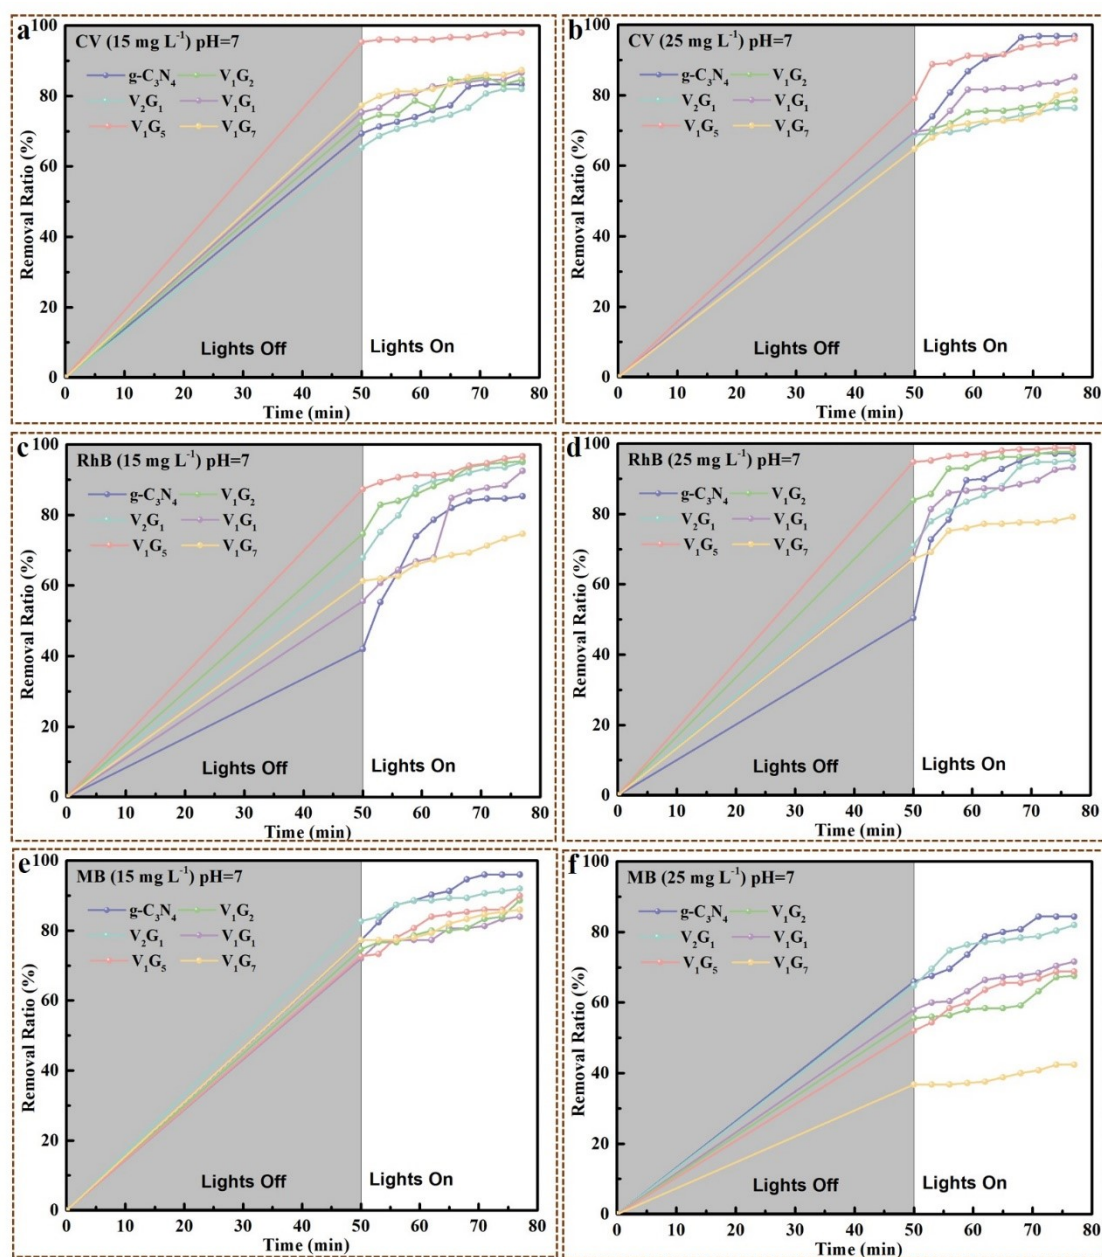

**Fig. S13** Removal ratios of CV with the original content of (a)  $15 \text{ mg L}^{-1}$ , (b)  $25 \text{ mg L}^{-1}$ ; RhB with the original content of (c)  $15 \text{ mg L}^{-1}$ , (d)  $25 \text{ mg L}^{-1}$ ; MB with the original content of (e)  $15 \text{ mg L}^{-1}$ , (f)  $25 \text{ mg L}^{-1}$  onto  $V_xG_y$  heterojunctions at pH value of 7.

## Notes and references

- 1 S.S. Xue, D.L. He, X.C. Hu, Y.Q. Cao, J.L. Ge, S.X. Liu, *J. Polym. Eng.*, 2023, **43**, 594.
- 2 J.Y. Li, X. Yu, Y. Zhu, X.H. Fu, Y.M. Zhang, *J. Alloy Compd.*, 2021, **850**, 156778.
- 3 M. Madi, M. Tahir, Z.Y. Zakaria, *J. CO<sub>2</sub> Util.*, 2022, **65**, 102238.
